# Supplementary material
Source: publisher figshare collection journal article supplement (https://karger.figshare.com/ndownloader/files/21772293)
Supplement: Supplementary file 1 [file 21772293]

Supplementary table 1

Abdel-Hamid Mohamid El-Hawy M: Minimal modifications could decrease fistula rate during tubularized incised plate procedure in distal hypospadias repair. J Pediatr Urol 9:789-792 (2013).

Abdelrahman MA, O'Connor KM, Kiely EA: MAGPI hypospadias repair: factors that determine outcome. Ir J Med Sci 182:585-588 (2013).

Abolyosr A: Snodgrass hypospadias repair with onlay overlapping double-layered dorsal dartos flap without urethrocutaneous fistula: experience of 156 cases. J Pediatr Urol 6:403-407 (2010).

Aboutaleb H: Role of the urethral plate characters in the success of tubularized incised plate urethroplasty. Indian journal of plastic surgery : official publication of the Association of Plastic Surgeons of India 47:227-231 (2014).

Abouzeid AA: Modified Byars' flaps for securing skin closure in proximal and mid-penile hypospadias. Ther Adv Urol 3:251-256 (2011).

Acimi S: Comparative study of two techniques used in distal hypospadias repair: tubularized incised plate (Snodgrass) and tubularized urethral plate (Duplay). Scand J Urol Nephrol 45:68-71 (2011).

Acimi S: Proximal hypospadias: effect of urethral plate mobilization on release of chordee. Urology 80:894-898 (2012).

Adorisio O, Elia A, Landi L, Taverna M, Malvasio V, D'Asta F, Alfredo Danti D: The importance of patient selection in the treatment of distal hypospadias using modified Koff procedure. J Pediatr Urol 6:139-142 (2010).

Ahmed M, Alsaid A: Is combined inner preputial inlay graft with tubularized incised plate in hypospadias repair worth doing? J Pediatr Urol 11:229.e221-229.e224 (2015).

Aisuodionoe-Shadrach OI, Atim T, Eniola BS, Ohemu AA: Hypospadias repair and outcome in Abuja, Nigeria: A 5-year single-centre experience. African journal of paediatric surgery : AJPS 12:41-44 (2015).

Akbiyik F, Tiryaki T, Senel E, Mambet E, Livanelioglu Z, Atayurt H: Clinical experience in hypospadias: results of tubularized incised plate in 496 patients. Urology 73:1255-1257 (2009).

Al-Adl AM, El-Karamany TM, Bassiouny AS: Distal extension of the midline urethral-plate incision in the Snodgrass hypospadias repair: An objective assessment of the functional and cosmetic outcomes. Arab journal of urology 12:116-126 (2014).

Al-Saied G, Gamal A: Versatility of tubularized incised plate urethroplasty in the management of different types of hypospadias: 5-year experience. African journal of paediatric surgery : AJPS 6:88-92 (2009).

Alizadeh F, Fakoor A, Haghdani S: A comparison between tourniquet application and epinephrine injection for hemostasis during hypospadias surgery: The effect on bleeding and postoperative outcome. J Pediatr Urol 12:160.e161-160.e165 (2016).

Alizadeh F, Shirani S: Outcomes of Patients with Glanular Hypospadias or Dorsal Hood Deformity with Mild Chordee Ttreated by Modified Firlit's Technique. Urology journal 13:2908-2910 (2016).

Alkan M, Oguzkurt P, Ezer SS, Ince E, Hicsonmez A: Evaluation of the results of eccentric circummeatal-based flap with combined limited urethral mobilization technique for distal hypospadias repair. J Pediatr Urol 4:206-209 (2008).

Almodhen F, Alzahrani A, Jednak R, Capolicchio JP, El Sherbiny MT: Nonstented tubularized incised plate urethroplasty with Y-to-I spongioplasty in non-toilet trained children. Canadian Urological Association journal = Journal de l'Association des urologues du Canada 2:110-114 (2008).

Alsaywid BS, Mohammedkhalil AK, Mesawa AA, Alzahrani SY, Askar AH, Abuznadah WT, Alrimawi MH: Role of tubularization of urethral plate in development of urethrocutaneous fistula post hypospadias repair. Urology annals 9:141-144 (2017).

Aminsharifi A, Taddayun A, Assadolahpoor A, Khezri A: Combined use of Mathieu procedure with plate incision for hypospadias repair: a randomized clinical trial. Urology 72:305-308 (2008).

Andersson M, Doroszkiewicz M, Arfwidsson C, Abrahamsson K, Holmdahl G: Hypospadias repair with tubularized incised plate: Does the obstructive flow pattern resolve spontaneously? J Pediatr Urol 7:441-445 (2011).

Andersson M, Doroszkiewicz M, Arfwidsson C, Abrahamsson K, Sillen U, Holmdahl G: Normalized Urinary Flow at Puberty after Tubularized Incised Plate Urethroplasty for Hypospadias in Childhood. The Journal of urology 194:1407-1413 (2015).

Ansari MS, Agarwal S, Sureka SK, Mandhani A, Kapoor R, Srivastava A: Impact of changing trends in technique and learning curve on outcome of hypospadias repair: An experience from tertiary care center. Indian journal of urology : IJU : journal of the Urological Society of India 32:216-220 (2016).

Aoki K, Fujimoto K, Yoshida K, Hirao Y, Ueoka K: One-stage repair of severe hypospadias using modified tubularized transverse preputial island flap with V-incision suture. J Pediatr Urol 4:438-441 (2008).

Appignani A, Prestipino M, Bertozzi M, Nardi N, Falcone F: Double-cross flap protection: new technique for coverage of neourethra in hypospadias repair. The Journal of urology 182:1521-1527 (2009).

Ardelt PU, Cederquist M, Schoenthaler M, Miernik A, Frankenschmidt A: The glandular resection and central embedding modification (GRACE) in Duckett and Barcat hypospadias repair. Urol Int 90:358-364 (2013).

Ardelt PU, Cederqvist M, Barth M, Frankenschmidt A: The SIGHT questionnaire: A novel assessment tool for Satisfaction In Genital Hypospadias Treatment. J Pediatr Urol 13:33.e31-33.e38 (2017).

Ardelt PU, Glaser T, Schoenthaler M, Gerharz EW, Frankenschmidt A: Glandular resection and central embedding in hypospadias repair--a novel modification of the Barcat technique. J Pediatr Surg 47:1032-1037 (2012).

Arlen AM, Kirsch AJ, Leong T, Broecker BH, Smith EA, Elmore JM: Further analysis of the Glans-Urethral Meatus-Shaft (GMS) hypospadias score: correlation with postoperative complications. J Pediatr Urol 11:71.e71-71.e75 (2015).

Arnaud A, Harper L, Aulagne MB, Michel JL, Maurel A, Dobremez E, Fourcade L, Andriamananarivo L: Choosing a technique for severe hypospadias. African journal of paediatric surgery : AJPS 8:286-290 (2011).

Asgari SA, Safarinejad MR, Poorreza F, Asl AS, Ghanaie MM, Shahab E: The effect of parenteral testosterone administration prior to hypospadias surgery: A prospective, randomized and controlled study. J Pediatr Urol 11:143.e141-143.e146 (2015).

Asklund C, Jensen TK, Main KM, Sobotka T, Skakkebaek NE, Jorgensen N: Semen quality, reproductive hormones and fertility of men operated for hypospadias. Int J Androl 33:80-87 (2010).

Aslam R, Campbell K, Wharton S, Bracka A: Medium to long term results following single stage Snodgrass hypospadias repair. Journal of plastic, reconstructive & aesthetic surgery : JPRAS 66:1591-1595 (2013).

Aulagne MB, Harper L, de Napoli-Cocci S, Bondonny JM, Dobremez E: Long-term outcome of severe hypospadias. J Pediatr Urol 6:469-472 (2010).

Baba AA, Wani SA, Bhat NA, Mufti GN, Lone TN, Nazir S: Buck's fascia repair with glanuloplasty in hypospadias surgery: A simple approach with excellent outcome. J Pediatr Urol 13:633.e631-633.e635 (2017).

Babu R: Glans meatus proportion in hypospadias versus normal: does marking reference points impact outcome? J Pediatr Urol 10:459-462 (2014).

Babu R, Hariharasudhan S: Tunica vaginalis flap is superior to inner preputial dartos flap as a waterproofing layer for primary TIP repair in midshaft hypospadias. J Pediatr Urol 9:804-807 (2013).

Badawy H, Morsi H: Long-term followup of dermal grafts for repair of severe penile curvature. The Journal of urology 180:1842-1845 (2008).

Badawy H, Orabi S, Hanno A, Abdelhamid H: Posterior hypospadias: Evaluation of a paradigm shift from single to staged repair. J Pediatr Urol 14:28.e21-28.e28 (2018).

Bae SH, Lee JN, Kim HT, Chung SK: Urethroplasty by use of turnover flaps (modified mathieu procedure) for distal hypospadias repair in adolescents: comparison with the tubularized incised plate procedure. Korean journal of urology 55:750-755 (2014).

Bakal U, Abes M, Sarac M: Necrosis of the ventral penile skin flap: a complication of hypospadias surgery in children. Advances in urology 2015:452870 (2015).

Barbagli G, Perovic S, Djinovic R, Sansalone S, Lazzeri M: Retrospective descriptive analysis of 1,176 patients with failed hypospadias repair. The Journal of urology 183:207-211 (2010).

Barbagli G, Sansalone S, Djinovic R, Lazzeri M: Surgical Repair of Late Complications in Patients Having Undergone Primary Hypospadias Repair during Childhood: A New Perspective. Advances in urology 2012:705212 (2012).

Bertozzi M, Yildiz A, Kamal B, Mustafa M, Prestipino M, Yigiter M, Al-Darawany H, Oral A, Nardi N, Appignani A: Multicentric experience on double dartos flap protection in tubularized incised plate urethroplasty for distal and midpenile hypospadias. Pediatr Surg Int 27:1331-1336 (2011).

Bhat A, Bhat M, Kumar V, Kumar R, Mittal R, Saksena G: Comparison of variables affecting the surgical outcomes of tubularized incised plate urethroplasty in adult and pediatric hypospadias. J Pediatr Urol 12:108.e101-108.e107 (2016).

Bhat A, Gandhi A, Saxena G, Choudhary GR: Preputial reconstruction and tubularized incised plate urethroplasty in proximal hypospadias with ventral penile curvature. Indian journal of urology : IJU : journal of the Urological Society of India 26:507-510 (2010).

Bhat A, Sabharwal K, Bhat M, Saran R, Singla M, Kumar V: Outcome of tubularized incised plate urethroplasty with spongioplasty alone as additional tissue cover: A prospective study. Indian journal of urology : IJU : journal of the Urological Society of India 30:392-397 (2014).

Bilici S, Sekmenli T, Gunes M, Gecit I, Bakan V, Isik D: Comparison of dartos flap and dartos flap plus spongioplasty to prevent the formation of fistulae in the Snodgrass technique. Int Urol Nephrol 43:943-948 (2011).

Blanc T, Ayedi A, El-Ghoneimi A, Abdoul H, Aigrain Y, Paris F, Sultan C, Carel JC, Leger J: Testicular function and physical outcome in young adult males diagnosed with idiopathic 46 XY disorders of sex development during childhood. European journal of endocrinology 165:907-915 (2011).

Braga LH, Lorenzo AJ, Bagli DJ, Dave S, Eeg K, Farhat WA, Pippi Salle JL, Khoury AE: Ventral penile lengthening versus dorsal plication for severe ventral curvature in children with proximal hypospadias. The Journal of urology 180:1743-1747; discussion 1747-1748 (2008).

Burgu B, Aydogdu O, Soylemez H, Soygur T: Both dorsal and ventral flaps can be used in previously circumcised hypospadic adults with comparable success rates. Int Urol Nephrol 42:689-695 (2010).

Bush NC, Barber TD, Dajusta D, Prieto JC, Ziada A, Snodgrass W: Results of distal hypospadias repair after pediatric urology fellowship training: A comparison of junior surgeons with their mentor. J Pediatr Urol 12:162.e161-162.e164 (2016).

Bush NC, Holzer M, Zhang S, Snodgrass W: Age does not impact risk for urethroplasty complications after tubularized incised plate repair of hypospadias in prepubertal boys. J Pediatr Urol 9:252-256 (2013).

Cambareri GM, Yap M, Kaplan GW: Hypospadias repair with onlay preputial graft: a 25-year experience with long-term follow-up. BJU Int 118:451-457 (2016).

Castagnetti M, Rigamonti W: Aptness and complications of labial mucosa grafts for the repair of anterior urethral defects in children and adults: single centre experience with 115 cases. World J Urol 27:799-803 (2009).

Castagnetti M, Zhapa E, Rigamonti W: Primary severe hypospadias: comparison of reoperation rates and parental perception of urinary symptoms and cosmetic outcomes among 4 repairs. The Journal of urology 189:1508-1513 (2013).

Castellan M, Gosalbez R, Devendra J, Bar-Yosef Y, Labbie A: Ventral corporal body grafting for correcting severe penile curvature associated with single or two-stage hypospadias repair. J Pediatr Urol 7:289-293 (2011).

Catti M, Lottmann H, Babloyan S, Lortat-Jacob S, Mouriquand P: Original Koyanagi urethroplasty versus modified Hayashi technique: outcome in 57 patients. J Pediatr Urol 5:300-306 (2009).

Chalmers D, Wiedel CA, Siparsky GL, Campbell JB, Wilcox DT: Discovery of hypospadias during newborn circumcision should not preclude completion of the procedure. The Journal of pediatrics 164:1171-1174.e1171 (2014).

Chen Y, Zhang J, Ji C, Liang W, Pan S, Wu B: Modification of the Koyanagi Technique for the Single-Stage Repair of Proximal Hypospadias. Ann Plast Surg 76:693-696 (2016).

Chertin B, Natsheh A, Ben-Zion I, Prat D, Kocherov S, Farkas A, Shenfeld OZ: Objective and subjective sexual outcomes in adult patients after hypospadias repair performed in childhood. The Journal of urology 190:1556-1560 (2013).

Ching CB, Wood HM, Ross JH, Gao T, Angermeier KW: The Cleveland Clinic experience with adult hypospadias patients undergoing repair: their presentation and a new classification system. BJU Int 107:1142-1146 (2011).

Chua ME, Alqarni N, Ming JM, Alyami F, Santos JD, Lopes RI, Farhat WA, Koyle MA: Single penile incision for combined hypospadias and inguinal surgery: A comparative study. Canadian Urological Association journal = Journal de l'Association des urologues du Canada 11:E192-E196 (2017).

Chung JW, Choi SH, Kim BS, Chung SK: Risk factors for the development of urethrocutaneous fistula after hypospadias repair: a retrospective study. Korean journal of urology 53:711-715 (2012).

Ciancio F, Lo Russo G, Innocenti A, Portincasa A, Parisi D, Mondaini N: Penile length is a very important factor for cosmesis, function and psychosexual development in patients affected by hypospadias: Results from a long-term longitudinal cohort study. Int J Immunopathol Pharmacol 28:421-425 (2015).

da Silva EA, Lobountchenko T, Marun MN, Rondon A, Damiao R: Role of penile biometric characteristics on surgical outcome of hypospadias repair. Pediatr Surg Int 30:339-344 (2014).

Daher P, Khoury A, Riachy E, Atallah B: Three-week or one-week bladder catheterization for hypospadias repair? A retrospective-prospective observational study of 189 patients. J Pediatr Surg 50:1063-1066 (2015).

de Mattos e Silva E, Gorduza DB, Catti M, Valmalle AF, Demede D, Hameury F, Pierre-Yves M, Mouriquand P: Outcome of severe hypospadias repair using three different techniques. J Pediatr Urol 5:205-211; discussion 212-204 (2009).

Dhua AK, Aggarwal SK, Sinha S, Ratan SK: Soft tissue covers in hypospadias surgery: Is tunica vaginalis better than dartos flap? J Indian Assoc Pediatr Surg 17:16-19 (2012).

Ding J, Li Q, Li S, Li F, Zhou C, Zhou Y, Hu J, Xie L, Cao Y, Zhang S: Ten years' experience for hypospadias repair: combined buccal mucosa graft and local flap for urethral reconstruction. Urol Int 93:454-459 (2014).

Djordjevic ML, Majstorovic M, Stanojevic D, Bizic M, Kojovic V, Vukadinovic V, Korac G, Krstic Z, Perovic SV: Combined buccal mucosa graft and dorsal penile skin flap for repair of severe hypospadias. Urology 71:821-825 (2008).

Dokter EM, Moues CM, Rooij IALMV, Biezen JJV: Complications after Hypospadias Correction: Prognostic Factors and Impact on Final Clinical Outcome. European journal of pediatric surgery : official journal of Austrian Association of Pediatric Surgery [et al] = Zeitschrift fur Kinderchirurgie 28:200-206 (2018).

Dutta HK: Meatal and corpus spongiosum advancement: a better technique for distal hypospadias repair. Pediatr Surg Int 29:633-638 (2013).

Eassa W, Brzezinski A, Capolicchio JP, Jednak R, El-Sherbiny M: How do asymptomatic toilet-trained children void following tubularized incised-plate hypospadias repair? Canadian Urological Association journal = Journal de l'Association des urologues du Canada 6:238-242 (2012).

Eassa W, Jednak R, Capolicchio JP, Brzezinski A, El-Sherbiny M: Risk factors for re-operation following tubularized incised plate urethroplasty: a comprehensive analysis. Urology 77:716-720 (2011).

Ekinci S, Ciftci AO, Karnak I, Senocak ME: Eccentric circummeatal based flap with limited urethral mobilization: An easy technique for distal hypospadias repair. J Pediatr Urol 12:116.e111-116.e116 (2016).

El-Karamany TM, Al-Adl AM, Omar RG, Abdel Aal AM, Eldakhakhny AS, Abdelbaki SA: A Critical Analysis of Stented and Unstented Tubularized Incised Plate Urethroplasty Through a Prospective Randomized Study and Assessment of Factors Influencing the Functional and Cosmetic Outcomes. Urology 107:202-208 (2017).

el-Kassaby AW, Al-Kandari AM, Elzayat T, Shokeir AA: Modified tubularized incised plate urethroplasty for hypospadias repair: a long-term results of 764 patients. Urology 71:611-615 (2008).

El-Shazly M: Inclusion and exclusion criteria to overcome bias and reach a valid conclusion for interpositional flap coverage in primary hypospadias repair with tubularized incised plate urethroplasty. Ann Plast Surg 71:581-585 (2013).

El Darawany HM, Al Damhogy ME: Urethral Mobilization as an Alternative Procedure for Distal Hypospadias Repair. Urology 104:183-186 (2017).

Elbakry A, Hegazy M, Matar A, Zakaria A: Tubularised incised-plate versus tubularisation of an intact and laterally augmented plate for hypospadias repair: A prospective randomised study. Arab journal of urology 14:163-170 (2016).

Elbakry A, Zakaria A, Matar A, El Nashar A: The management of moderate and severe congenital penile torsion associated with hypospadias: Urethral mobilisation is not a panacea against torsion. Arab journal of urology 11:1-7 (2013).

ElGanainy EO: A modified onlay island flap vs. Mathieu urethroplasty for distal hypospadias repair: A prospective randomised study. Arab journal of urology 13:169-175 (2015).

Elganainy EO, Abdelsalam YM, Gadelmoula MM, Shalaby MM: Combined Mathieu and Snodgrass urethroplasty for hypospadias repair: a prospective randomized study. International journal of urology : official journal of the Japanese Urological Association 17:661-665 (2010).

ElGanainy EO, Hameed DA, Abdelsalam YM, Abdelaziz MA: Prepuce preserving versus conventional Mathieu urethroplasty for distal hypospadias - a prospective randomized study. J Pediatr Urol 8:264-267 (2012).

Elmoghazy H, Hussein MM, Mohamed E, Badawy A, Alsagheer G, Abd Elhamed AM: A novel technique for repair of mid-penile hypospadias using a preputial skin flap: results of 110 patients. Int Urol Nephrol 48:1943-1949 (2016).

Elsayed ER, Khalil S, Abd Samad K, Abdalla MM: Evaluation of distally folded onlay flap in repair of distal penile hypospadias. J Pediatr Urol 8:103-107 (2012).

Elsayed ER, Zayed AM, El Sayed D, El Adl M: Interposition of dartos flaps to prevent fistula after tubularized incised-plate repair of hypospadias. Arab journal of urology 9:123-126 (2011).

Erol A, Kayikci A, Memik O, Cam K, Akman Y: Single vs. double dartos interposition flaps in preventing urethrocutaneous fistula after tubularized incised plate urethroplasty in primary distal hypospadias: a prospective randomized study. Urol Int 83:354-358 (2009).

Esposito C, Savanelli A, Escolino M, Giurin I, Iaquinto M, Alicchio F, Roberti A, Settimi A: Preputioplasty associated with urethroplasty for correction of distal hypospadias: a prospective study and proposition of a new objective scoring system for evaluation of esthetic and functional outcome. J Pediatr Urol 10:294-299 (2014).

Fasching G, Arneitz C, Gritsch-Olipp G: Foreskin reconstruction and preservation of a thin distal urethra: a challenge in tubularized incised plate urethroplasty. Pediatr Surg Int 27:755-760 (2011).

Faustin Felicien MT, Nwaha Makon AS, Kamadjou C, Fossi G, Le Coultre C, Andze OG, Sosso MA, Mure PY: Our experience of proximal hypospadias repair using the Cloutier-Bracka technique at the Gynaeco-Obstetric and Paediatric Hospital, Yaounde-Cameroon. African journal of paediatric surgery : AJPS 13:193-195 (2016).

Feng J, Yang Z, Tang Y, Chen W, Zhao MX, Ma N, Wang WX, Xu LS, Li YQ: Risk Factors for Urethrocutaneous Fistula Repair After Hypospadias Surgery: A Retrospective Study. Ann Plast Surg 79:e41-e44 (2017).

Ferro F, Vallasciani S, Borsellino A, Atzori P, Martini L: Snodgrass urethroplasty: grafting the incised plate--10 years later. The Journal of urology 182:1730-1734 (2009).

Fine R, Reda EF, Zelkovic P, Gitlin J, Freyle J, Franco I, Palmer LS: Tunneled buccal mucosa tube grafts for repair of proximal hypospadias. The Journal of urology 193:1813-1817 (2015).

Fossum M, Skikuniene J, Orrego A, Nordenskjold A: Prepubertal follow-up after hypospadias repair with autologous in vitro cultured urothelial cells. Acta Paediatrica (Oslo, Norway : 1992) 101:755-760 (2012).

Fraumann SA, Stephany HA, Clayton DB, Thomas JC, Pope JCt, Adams MC, Brock JW, 3rd, Tanaka ST: Long-term follow-up of children who underwent severe hypospadias repair using an online survey with validated questionnaires. J Pediatr Urol 10:446-450 (2014).

Frimberger D, Campbell J, Kropp BP: Hypospadias outcome in the first 3 years after completing a pediatric urology fellowship. J Pediatr Urol 4:270-274 (2008).

Gardikis S, Kambouri K, Giatromanolaki A, Agelidou M, Kalaitzis C, Giannakopoulos S, Touloupidis S, Vaos G: The use of a perimeatal-based penile skin flap to cover the repair of a tubularized incised plate urethroplasty: from experimental surgery to clinical practice. J Pediatr Urol 10:469-473 (2014).

Gargollo PC, Cai AW, Borer JG, Retik AB: Management of recurrent urethral strictures after hypospadias repair: is there a role for repeat dilation or endoscopic incision? J Pediatr Urol 7:34-38 (2011).

Garnier S, Maillet O, Cereda B, Ollivier M, Jeandel C, Broussous S, Lopez C, Paris F, Philibert P, Amouroux C, Jeandel C, Coffy A, Gaspari L, Daures JP, Sultan C, Kalfa N: Late surgical correction of hypospadias increases the risk of complications: a series of 501 consecutive patients. BJU Int 119:942-947 (2017).

Ghanem MA, Nijman RJ: Outcome analysis of tubularized incised urethral plate using dorsal dartos flap for proximal penile hypospadias repair. J Pediatr Urol 6:477-480 (2010).

Ghidini F, Sekulovic S, Castagnetti M: Parental Decisional Regret after Primary Distal Hypospadias Repair: Family and Surgery Variables, and Repair Outcomes. The Journal of urology 195:720-724 (2016).

Gorduza DB, Gay CL, de Mattos E Silva E, Demede D, Hameury F, Berthiller J, Mure PY, Mouriquand PD: Does androgen stimulation prior to hypospadias surgery increase the rate of healing complications? - A preliminary report. J Pediatr Urol 7:158-161 (2011).

Goyal A, Singh MV, Dickson AP: Oral mucosa graft for repair of hypospadias: outcomes at puberty. The Journal of urology 184:2504-2508 (2010).

Grosos C, Bensaid R, Gorduza DB, Mouriquand P: Is it safe to solely use ventral penile tissues in hypospadias repair? Long-term outcomes of 578 Duplay urethroplasties performed in a single institution over a period of 14 years. J Pediatr Urol 10:1232-1237 (2014).

Guarino N, Vallasciani SA, Marrocco G: A new suture material for hypospadias surgery: a comparative study. The Journal of urology 181:1318-1322; discussion 1322-1313 (2009).

Guinot A, Arnaud A, Azzis O, Habonimana E, Jasienski S, Fremond B: Preliminary experience with the use of an autologous platelet-rich fibrin membrane for urethroplasty coverage in distal hypospadias surgery. J Pediatr Urol 10:300-305 (2014).

Gupta V, Yadav SK, Alanzi T, Amer I, Salah M, Ahmed M: Grafted tubularised incised-plate urethroplasty: An objective assessment of outcome with lessons learnt from surgical experience with 263 cases. Arab journal of urology 14:299-304 (2016).

Hadidi AT: Lateral-based flap: a single stage urethral reconstruction for proximal hypospadias. J Pediatr Surg 44:797-801 (2009).

Hadidi AT: Double Y glanuloplasty for glanular hypospadias. J Pediatr Surg 45:655-660 (2010).

Hadidi AT: Proximal hypospadias with small flat glans: the lateral-based onlay flap technique. J Pediatr Surg 47:2151-2157 (2012a).

Hadidi AT: The slit-like adjusted Mathieu technique for distal hypospadias. J Pediatr Surg 47:617-623 (2012b).

Hafez AT, Helmy T: Tubularized incised plate repair for penoscrotal hypospadias: role of surgeon's experience. Urology 79:425-427 (2012).

Haid B, Becker T, Koen M, Berger C, Strasser C, Roesch J, Zniva C, Oswald J: Penile appearance after hypospadias correction from a parent's point of view: Comparison of the hypospadias objective penile evaluation score and parents penile perception score. J Pediatr Urol 12:33.e31-33.e37 (2016).

Hammouda HM, Hassan YS, Abdelateef AM, Elgammal MA: New concept in urethral advancement for anterior hypospadias. J Pediatr Urol 4:286-289 (2008).

Hayashi Y, Mizuno K, Moritoki Y, Nakane A, Kato T, Kurokawa S, Kamisawa H, Nishio H, Kohri K, Kojima Y: Can spongioplasty prevent fistula formation and correct penile curvature in TIP urethroplasty for hypospadias? Urology 81:1330-1335 (2013).

Hoag CC, Gotto GT, Morrison KB, Coleman GU, Macneily AE: Long-term functional outcome and satisfaction of patients with hypospadias repaired in childhood. Canadian Urological Association journal = Journal de l'Association des urologues du Canada 2:23-31 (2008).

Holland AJ, Abubacker M, Smith GH, Cass DT: Management of urethrocutaneous fistula following hypospadias repair. Pediatr Surg Int 24:1047-1051 (2008).

Hueber PA, Antczak C, Abdo A, Franc-Guimond J, Barrieras D, Houle AM: Long-term functional outcomes of distal hypospadias repair: a single center retrospective comparative study of TIPs, Mathieu and MAGPI. J Pediatr Urol 11:68.e61-68.e67 (2015).

Hueber PA, Salgado Diaz M, Chaussy Y, Franc-Guimond J, Barrieras D, Houle AM: Long-term functional outcomes after penoscrotal hypospadias repair: A retrospective comparative study of proximal TIP, Onlay, and Duckett. J Pediatr Urol 12:198.e191-198.e196 (2016).

Hussein NS, Samat SB, Abdullah MA, Gohar MN: Cosmetic and functional outcomes of two-stage hypospadias repair: an objective scoring evaluation and uroflowmetry. Turkish journal of urology 39:90-95 (2013).

Jayanthi VR, Ching CB, DaJusta DG, McLeod DJ, Alpert SA: The modified Ulaanbaatar procedure: Reduced complications and enhanced cosmetic outcome for the most severe cases of hypospadias. J Pediatr Urol 13:353.e351-353.e357 (2017).

Jeans L, Curnier A, Sheikh Z, Stevenson JH: Midterm outcome of the modified Bretteville technique for hypospadias reconstruction. Journal of plastic, reconstructive & aesthetic surgery : JPRAS 62:369-373 (2009).

Ji C, Zhang J, Liang W, Pan S, Chen Y, Zhang J, Yao Y: Correcting Glanular Dislocation in Hypospadias With Up-to-Tip Technique and Double Wing Flaps. Ann Plast Surg 76:102-107 (2016).

Jiao C, Wu R, Xu X, Yu Q: Long-term outcome of penile appearance and sexual function after hypospadias repairs: situation and relation. Int Urol Nephrol 43:47-54 (2011).

Jones BC, O'Brien M, Chase J, Southwell BR, Hutson JM: Early hypospadias surgery may lead to a better long-term psychosexual outcome. The Journal of urology 182:1744-1749 (2009).

Kajbafzadeh AM, Nezami BG: Detubularized pedicled vaginal onlay flap urethroplasty: a new method for hypospadias repair of ambiguous genitalia. The Journal of urology 180:2159-2166 (2008).

Kajbafzadeh AM, Sabetkish S, Mahboubi AH, Sabetkish N: Single incisional approach for reconstruction of hypospadias and concomitant inguinal hernia. J Pediatr Urol 10:45-51 (2014).

Kallampallil J, Hennayake S: Foreskin retractility following hypospadias repair with preputioplasty--medium term outcomes. J Pediatr Urol 9:1204-1209 (2013).

Kanaroglou N, Wehbi E, Alotay A, Bagli DJ, Koyle MA, Lorenzo AJ, Farhat WA: Is there a role for prophylactic antibiotics after stented hypospadias repair? The Journal of urology 190:1535-1539 (2013).

Kanematsu A, Higuchi Y, Tanaka S, Hashimoto T, Nojima M, Yamamoto S: Multivariate Analysis of the Factors Associated With Sexual Intercourse, Marriage, and Paternity of Hypospadias Patients. The journal of sexual medicine 13:1488-1495 (2016).

Kang L, Huang G, Zeng L, Huang Y, Ma X, Zhang Y, Yuan M, Zhang J, Huang L: A New Modification of the Koyanagi Technique for the One-stage Repair of Severe Hypospadias. Urology 93:175-179 (2016).

Karakus SC, Koku N, Parmaksiz ME, Ertaskin I, Kilincaslan H, Deliaga H: The effect of urethral catheter size on meatal stenosis formation in children undergoing tubularized incised plate urethroplasty. Urology journal 10:1095-1098 (2014).

Kaya C, Bektic J, Radmayr C, Schwentner C, Bartsch G, Oswald J: The efficacy of dihydrotestosterone transdermal gel before primary hypospadias surgery: a prospective, controlled, randomized study. The Journal of urology 179:684-688 (2008).

Keays MA, Starke N, Lee SC, Bernstein I, Snodgrass WT, Bush NC: Patient Reported Outcomes in Preoperative and Postoperative Patients with Hypospadias. The Journal of urology 195:1215-1220 (2016).

Khan M, Majeed A, Hayat W, Ullah H, Naz S, Shah SA, Tahmeed T, Yousaf K, Tahir M: Hypospadias repair: a single centre experience. Plastic surgery international 2014:453039 (2014).

Kim KH, Lee HY, Im YJ, Jung HJ, Hong CH, Han SW: Clinical course of vesicoureteral reflux in patients with hypospadias. International journal of urology : official journal of the Japanese Urological Association 18:521-524 (2011).

Kiss A, Sulya B, Szasz AM, Romics I, Kelemen Z, Toth J, Merksz M, Kemeny S, Nyirady P: Long-term psychological and sexual outcomes of severe penile hypospadias repair. The journal of sexual medicine 8:1529-1539 (2011).

Kocherov S, Prat D, Koulikov D, Ioscovich A, Shenfeld OZ, Farkas A, Chertin B: Outcome of hypospadias repair in toilet-trained children and adolescents. Pediatr Surg Int 28:429-433 (2012).

Koenig JF, Kottwitz M, McKenna PH: Urethral mobilization for distal and mid shaft hypospadias with chordee. The Journal of urology 190:1545-1548 (2013).

Korvald C, Stubberud K: High odds for freedom from early complications after tubularized incised-plate urethroplasty in 1-year-old versus 5-year-old boys. J Pediatr Urol 4:452-456 (2008).

Krull S, Rissmann A, Krause H, Mohnike K, Roehl FW, Koehn A, Hass HJ: Outcome after Hypospadias Repair: Evaluation Using the Hypospadias Objective Penile Evaluation Score. European journal of pediatric surgery : official journal of Austrian Association of Pediatric Surgery [et al] = Zeitschrift fur Kinderchirurgie 28:268-272 (2018).

Kureel SN, Vasudeva P, Sinha SK, Dalela D: "Limited" double dorsal dartos flap coverage. An effective alternative to conventional flap coverage of the neourethra following Mathieu repair for subcoronal hypospadias. Int Urol Nephrol 40:569-572 (2008).

Kuyumcuoglu U, Eryildirim B, Faydaci G, Tarhan F, Ozgul A: The comparison of Belt-Fuqua and "TIPU" techniques in proximal penile hypospadias cases: retrospective analysis of 65 cases. Int Urol Nephrol 41:755-759 (2009).

Lacy JM, Hendrix LN, Bole R, Habib E, Wootton CW, Ziada AM: Technical refinements to improve outcomes following distal hypospadias repair. The Canadian journal of urology 23:8184-8187 (2016).

Lee OT, Durbin-Johnson B, Kurzrock EA: Predictors of secondary surgery after hypospadias repair: a population based analysis of 5,000 patients. The Journal of urology 190:251-255 (2013).

Leslie JA, Cain MP, Kaefer M, Meldrum KK, Misseri R, Rink RC: Corporeal grafting for severe hypospadias: a single institution experience with 3 techniques. The Journal of urology 180:1749-1752; discussion 1752 (2008).

Liang W, Ji C, Chen Y, Zhang G, Zhang J, Yao Y, Zhang J: Surgical Repair of Mid-shaft Hypospadias Using a Transverse Preputial Island Flap and Pedicled Dartos Flap Around Urethral Orifice. Aesthetic Plast Surg 40:535-539 (2016).

Liu MM, Holland AJ, Cass DT: Assessment of postoperative outcomes of hypospadias repair with validated questionnaires. J Pediatr Surg 50:2071-2074 (2015).

Liu X, Li Y, Li S, Tang Y, Li Q: A new use of scrotal septal skin flap in repairing hypospadias. Ann Plast Surg 67:164-166 (2011).

Lorenzo AJ, Braga LH, Zlateska B, Leslie B, Farhat WA, Bagli DJ, Pippi Salle JL: Analysis of decisional conflict among parents who consent to hypospadias repair: single institution prospective study of 100 couples. The Journal of urology 188:571-575 (2012).

Lorenzo AJ, Pippi Salle JL, Zlateska B, Koyle MA, Bagli DJ, Braga LH: Decisional regret after distal hypospadias repair: single institution prospective analysis of factors associated with subsequent parental remorse or distress. The Journal of urology 191:1558-1563 (2014).

Macedo A, Liguori R, Garrone G, Ottoni S: One-stage complex primary hypospadia repair combining buccal mucosa graft, preputial flap and tunical vaginalis flap (the three-in-one technique). J Pediatr Urol 7:76.e71-76.e72 (2011).

McNamara ER, Schaeffer AJ, Logvinenko T, Seager C, Rosoklija I, Nelson CP, Retik AB, Diamond DA, Cendron M: Management of Proximal Hypospadias with 2-Stage Repair: 20-Year Experience. The Journal of urology 194:1080-1085 (2015).

Menon P, Rao KLN, Handu A, Balan L, Kakkar N: Outcome of urethroplasty after parenteral testosterone in children with distal hypospadias. J Pediatr Urol 13:292.e291-292.e297 (2017).

Mesrobian HG, Canning DA: Surgical technique for antegrade dissection of the preputial vascular pedicle during hypospadias repair. J Pediatr Urol 8:282-284 (2012).

Metzler IS, Nguyen HT, Hagander L, Jalloh M, Nguyen T, Gueye SM, deVries CR, Meara JG: Surgical outcomes and cultural perceptions in international hypospadias care. The Journal of urology 192:524-529 (2014).

Meyer C, Sukumar S, Sood A, Hanske J, Vetterlein M, Elder JS, Fisch M, Trinh QD, Friedman AA: Inpatients hypospadias care: trends and outcomes from the American nationwide inpatient sample. Korean journal of urology 56:594-600 (2015).

Mohajerzadeh L, Mirshemirani A, Rouzrokh M, Sadeghian N, Khaleghnejad-Tabari A, Mahdavi A, Poorhasan S: Evaluation of Onlay Island Flap Technique in Shallow Urethral Plate Hypospadiasis. Iranian journal of pediatrics 26:e660 (2016).

Mokhless IA, Youssif ME, Orabi SS, Ehnaish MM: Corporeal body grafting using buccal mucosa for posterior hypospadias with severe curvature. The Journal of urology 182:1726-1729 (2009).

Mollaeian M, Sheikh M, Tarlan S, Shojaei H: Urethral mobilization and advancement with distal triangular urethral plate flap for distal and select cases of mid shaft hypospadias: experience with 251 cases. The Journal of urology 180:290-293; discussion 293-294 (2008).

Moriya K, Mitsui T, Tanaka H, Nakamura M, Nonomura K: Long-term outcome of pituitary-gonadal axis and gonadal growth in patients with hypospadias at puberty. The Journal of urology 184:1610-1614 (2010).

Mouravas V, Filippopoulos A, Sfoungaris D: Urethral plate grafting improves the results of tubularized incised plate urethroplasty in primary hypospadias. J Pediatr Urol 10:463-468 (2014).

Moursy EE: Outcome of proximal hypospadias repair using three different techniques. J Pediatr Urol 6:45-53 (2010).

Mustafa M, Wadie BS, Abol-Enein H: Dorsal dartos flap in Snodgrass hypospadias repair: how to use it? Urol Int 81:215-217 (2008a).

Mustafa M, Wadie BS, Abol-Enein H: Standard Snodgrass technique in conjunction with double-layer covering of the neourethra with dorsal dartos flap is the therapy of first choice for hypospadias. Int Urol Nephrol 40:573-576 (2008b).

Myers JB, McAninch JW, Erickson BA, Breyer BN: Treatment of adults with complications from previous hypospadias surgery. The Journal of urology 188:459-463 (2012).

Maarouf AM, Shalaby EA, Khalil SA, Shahin AM: Single vs. double dartos layers for preventing fistula in a tubularised incised-plate repair of distal hypospadias. Arab journal of urology 10:408-413 (2012).

Nerli R, Santhoshi P, Guntaka A, Patil S, Hiremath M: Modified Koyanagi's procedure for proximal hypospadias: our experience. International journal of urology : official journal of the Japanese Urological Association 17:294-296 (2010).

Nerli RB, Guntaka AK, Patil RA, Patne PB: Dorsal inlay inner preputial graft for primary hypospadias repair. African journal of paediatric surgery : AJPS 11:105-108 (2014).

Nezami BG, Mahboubi AH, Tanhaeivash R, Tourchi A, Kajbafzadeh AM: Hypospadias repair and glans augmentation using a modified Mathieu technique. Pediatr Surg Int 26:299-303 (2010).

Okoro PE, Tsang T: Short hospital stay versus day-care Mathieu hypospadias repair. African journal of paediatric surgery : AJPS 5:29-31 (2008).

Orabi H, Safwat AS, Shahat A, Hammouda HM: The use of small intestinal submucosa graft for hypospadias repair: Pilot study. Arab journal of urology 11:415-420 (2013).

Ortqvist L, Andersson M, Strandqvist A, Nordenstrom A, Frisen L, Holmdahl G, Nordenskjold A: Psychosocial outcome in adult men born with hypospadias. J Pediatr Urol 13:79.e71-79.e77 (2017a).

Ortqvist L, Fossum M, Andersson M, Nordenstrom A, Frisen L, Holmdahl G, Nordenskjold A: Long-term followup of men born with hypospadias: urological and cosmetic results. The Journal of urology 193:975-981 (2015).

Ortqvist L, Fossum M, Andersson M, Nordenstrom A, Frisen L, Holmdahl G, Nordenskjold A: Sexuality and fertility in men with hypospadias; improved outcome. Andrology 5:286-293 (2017b).

Osifo OD, Mene AO: Hypospadias repair in a resource-poor region: coping with the challenges in 5 years. J Pediatr Urol 6:60-65 (2010).

Ozcan R, Emre S, Kendigelen P, Elicevik M, Emir H, Soylet Y, Buyukunal SN: Results of a Two-stage Technique for Treatment of Proximal Hypospadias with Severe Curvature: Creation of a Urethral Plate Using a Vascularized Preputial Island Flap. Urology journal 13:2629-2634 (2016).

Ozturk H: Dartos flap coverage of the neourethra following repair for primary hypospadias, reoperative hypospadias and urethrocutaneous fistulas. It is a safe approach. Acta Cir Bras 25:190-193 (2010).

Papouis G, Kaselas C, Skoumis K, Kaselas V: Repair of distal hypospadias and preputioplasty in one operation. Risks and advantages. Urol Int 82:183-186 (2009).

Parikh AM, Park AM, Sumfest J: Cumulative summation (CUSUM) charts in the monitoring of hypospadias outcomes: a tool for quality improvement initiative. J Pediatr Urol 10:306-311 (2014).

Patankar JZ, Fazal S, Ubaidullah S, Mukesh S: "Wide Skeletonization" Tubularised Incised Plate (TIP) Repair of Distal Penile Hypospadias with Narrow Urethral Plate. The Medical journal of Malaysia 68:305-308 (2013).

Perera M, Jones B, O'Brien M, Hutson JM: Long-term urethral function measured by uroflowmetry after hypospadias surgery: comparison with an age matched control. The Journal of urology 188:1457-1462 (2012).

Perez-Brayfield MR, Jorge JC, Aviles LA, Diaz J, Ortiz V, Morales-Cosme W: Concordance of Expert and Parental Opinion about Hypospadias Surgical Outcome Is Severity Dependent. Frontiers in pediatrics 4:2 (2016).

Pieretti RV, Pieretti A, Pieretti-Vanmarcke R: Circumcised hypospadias. Pediatr Surg Int 25:53-55 (2009).

Pippi Salle JL, Sayed S, Salle A, Bagli D, Farhat W, Koyle M, Lorenzo AJ: Proximal hypospadias: A persistent challenge. Single institution outcome analysis of three surgical techniques over a 10-year period. J Pediatr Urol 12:28.e21-28.e27 (2016).

Prat D, Natasha A, Polak A, Koulikov D, Prat O, Zilberman M, Abu Arafeh W, Moriel EZ, Shenfeld OZ, Mor Y, Farkas A, Chertin B: Surgical outcome of different types of primary hypospadias repair during three decades in a single center. Urology 79:1350-1353 (2012).

Radwan M, Soliman MG, Tawfik A, Abo-Elenen M, El-Benday M: Does the type of urinary diversion affect the result of distal hypospadias repair? A prospective randomized trial. Ther Adv Urol 4:161-165 (2012).

Ratan SK, Ratan J, Rattan KN: Is tubularization of the mobilized urethral plate a better alternative to tubularization of an incised urethral plate for hypospadias repair? Pediatr Surg Int 25:185-190 (2009).

Reid LA, Curnier AP, Stevenson JH: Objective outcome assessment of the modified Bretteville technique. Journal of plastic, reconstructive & aesthetic surgery : JPRAS 63:398-403 (2010).

Rigamonti W, Castagnetti M: Onlay on albuginea: modified onlay preputial island flap urethroplasty for single-stage repair of primary severe hypospadias requiring urethral plate division. Urology 77:1498-1502 (2011).

Ritch CR, Murphy AM, Woldu SL, Reiley EA, Hensle TW: Overnight urethral stenting after tubularized incised plate urethroplasty for distal hypospadias. Pediatr Surg Int 26:639-642 (2010).

Robinson AJ, Harry LE, Stevenson JH: Assessment of long term function following hypospadias reconstruction: do flow rates, flow quality and cosmesis improve with time? Results from the modified Bretteville technique. Journal of plastic, reconstructive & aesthetic surgery : JPRAS 66:120-125 (2013).

Rompre MP, Nadeau G, Moore K, Ajjaouj Y, Braga LH, Bolduc S: Learning curve for TIP urethroplasty: A single-surgeon experience. Canadian Urological Association journal = Journal de l'Association des urologues du Canada 7:E789-794 (2013).

Ruppen-Greeff NK, Landolt MA, Gobet R, Weber DM: Appraisal of adult genitalia after hypospadias repair: Do laypersons mind the difference? J Pediatr Urol 12:32.e31-32.e38 (2016).

Ruppen-Greeff NK, Weber DM, Gobet R, Landolt MA: Health-related quality of life in men with corrected hypospadias: an explorative study. J Pediatr Urol 9:551-558 (2013).

Rynja SP, Wouters GA, Van Schaijk M, Kok ET, De Jong TP, De Kort LM: Long-term followup of hypospadias: functional and cosmetic results. The Journal of urology 182:1736-1743 (2009).

Sabetkish S, Kajbafzadeh AM, Sabetkish N: Hypospadias and concomitant undescended testis: Comparison of no skin incision with inguinal and scrotal skin incision orchiopexy. Int J Surg 22:154-158 (2015).

Sarhan O, Saad M, Helmy T, Hafez A: Effect of suturing technique and urethral plate characteristics on complication rate following hypospadias repair: a prospective randomized study. The Journal of urology 182:682-685; discussion 685-686 (2009a).

Sarhan OM, El-Hefnawy AS, Hafez AT, Elsherbiny MT, Dawaba ME, Ghali AM: Factors affecting outcome of tubularized incised plate (TIP) urethroplasty: single-center experience with 500 cases. J Pediatr Urol 5:378-382 (2009b).

Scarpa M, Castagnetti M, Musi L, Rigamonti W: Is objective assessment of cosmetic results after distal hypospadias repair superior to subjective assessment? J Pediatr Urol 5:110-113 (2009).

Scarpa MG, Castagnetti M, Berrettini A, Rigamonti W, Musi L: Urinary function after Snodgrass repair of distal hypospadias: comparison with the Mathieu repair. Pediatr Surg Int 26:519-522 (2010).

Schneuer FJ, Holland AJ, Pereira G, Bower C, Nassar N: Prevalence, repairs and complications of hypospadias: an Australian population-based study. Arch Dis Child 100:1038-1043 (2015).

Schonbucher VB, Landolt MA, Gobet R, Weber DM: Health-related quality of life and psychological adjustment of children and adolescents with hypospadias. The Journal of pediatrics 152:865-872 (2008a).

Schonbucher VB, Landolt MA, Gobet R, Weber DM: Psychosexual development of children and adolescents with hypospadias. The journal of sexual medicine 5:1365-1373 (2008b).

Schwentner C, Seibold J, Colleselli D, Alloussi SH, Schilling D, Stenzl A, Radmayr C: Single-stage dorsal inlay full-thickness genital skin grafts for hypospadias reoperations: extended follow up. J Pediatr Urol 7:65-71 (2011).

Seibold J, Werther M, Alloussi S, Gakis G, Schilling D, Colleselli D, Stenzl A, Schwentner C: Objective long-term evaluation after distal hypospadias repair using the meatal mobilization technique. Scand J Urol Nephrol 44:298-303 (2010).

Seleim HM, Morsi H, Elbarbary MM: Neo-yoke repair for severe hypospadias: A simple modification for better outcome. J Pediatr Urol 13:290.e291-290.e297 (2017).

Seo S, Ochi T, Yazaki Y, Murakami H, Okawada M, Doi T, Miyano G, Koga H, Lane GJ, Yamataka A: Correction of penile ventral curvature in patients with minor or no hypospadias: a single surgeon's experience of 43 cases. Pediatr Surg Int 32:975-979 (2016).

Seo S, Ochi T, Yazaki Y, Okawada M, Doi T, Miyano G, Koga H, Lane GJ, Yamataka A: Soft tissue interposition is effective for protecting the neourethra during hypospadias surgery and preventing postoperative urethrocutaneous fistula: a single surgeon's experience of 243 cases. Pediatr Surg Int 31:297-303 (2015).

Shimada K, Matsumoto F, Matsui F, Takano S: Prepuce-sparing hypospadias repair with tubularized incised plate urethroplasty. International journal of urology : official journal of the Japanese Urological Association 15:720-723 (2008).

Shimotakahara A, Nakazawa N, Wada A, Nagata S, Koga H, Takahashi T, Miyano G, Lane GJ, Yamataka A: Tubularized incised plate urethroplasty with dorsal inlay graft prevents meatal/neourethral stenosis: a single surgeon's experience. J Pediatr Surg 46:2370-2372 (2011).

Shukla AK, Singh AP, Sharma P, Shukla J: Two Stages Repair of Proximal Hypospadias: Review of 700 Cases. J Indian Assoc Pediatr Surg 22:158-162 (2017).

Silay MS, Sirin H, Tepeler A, Karatag T, Armagan A, Horasanli K, Miroglu C: "Snodgraft" technique for the treatment of primary distal hypospadias: pushing the envelope. The Journal of urology 188:938-942 (2012).

Singh BP, Solanki FS, Kapoor R, Dassi V, Kaswan HK, Agrawal V, Swain SK, Andankar MG, Pathak HR: Factors predicting success in hypospadias repair using preputial flap with limited pedicle mobilization (Asopa procedure). Urology 76:92-96 (2010).

Sircili MH, e Silva FA, Costa EM, Brito VN, Arnhold IJ, Denes FT, Inacio M, de Mendonca BB: Long-term surgical outcome of masculinizing genitoplasty in large cohort of patients with disorders of sex development. The Journal of urology 184:1122-1127 (2010).

Snodgrass W, Bush N: Tubularized incised plate proximal hypospadias repair: Continued evolution and extended applications. J Pediatr Urol 7:2-9 (2011).

Snodgrass W, Cost N, Nakonezny PA, Bush N: Analysis of risk factors for glans dehiscence after tubularized incised plate hypospadias repair. The Journal of urology 185:1845-1849 (2011).

Snodgrass W, Dajusta D, Villanueva C, Bush N: Foreskin reconstruction does not increase urethroplasty or skin complications after distal TIP hypospadias repair. J Pediatr Urol 9:401-406 (2013a).

Snodgrass W, Villanueva C, Bush N: Primary and reoperative hypospadias repair in adults--are results different than in children? The Journal of urology 192:1730-1733 (2014a).

Snodgrass W, Villanueva C, Bush NC: Duration of follow-up to diagnose hypospadias urethroplasty complications. J Pediatr Urol 10:208-211 (2014b).

Snodgrass W, Ziada A, Yucel S, Gupta A: Comparison of outcomes of tubularized incised plate hypospadias repair and circumcision: a questionnaire-based survey of parents and surgeon. J Pediatr Urol 4:250-254 (2008).

Snodgrass WT, Bush N, Cost N: Tubularized incised plate hypospadias repair for distal hypospadias. J Pediatr Urol 6:408-413 (2010).

Snodgrass WT, Granberg C, Bush NC: Urethral strictures following urethral plate and proximal urethral elevation during proximal TIP hypospadias repair. J Pediatr Urol 9:990-994 (2013b).

Son le T, Hung le T, Thang le C, Linh NT: The use of dermal graft in severe chordee hypospadias repair: experience from Vietnam. Pediatr Surg Int 31:291-295 (2015).

Sowande AO, Olajide AO, Salako AA, Olajide FO, Adejuyigbe O, Talabi AO: Experience with transverse preputial island flap for repair of hypospadias in Ile-Ife, Nigeria. African journal of paediatric surgery : AJPS 6:40-43 (2009).

Spinoit AF, Poelaert F, Groen LA, Van Laecke E, Hoebeke P: Hypospadias repair at a tertiary care center: long-term followup is mandatory to determine the real complication rate. The Journal of urology 189:2276-2281 (2013).

Spinoit AF, Poelaert F, Van Praet C, Groen LA, Van Laecke E, Hoebeke P: Grade of hypospadias is the only factor predicting for re-intervention after primary hypospadias repair: a multivariate analysis from a cohort of 474 patients. J Pediatr Urol 11:70.e71-70.e76 (2015).

Spinoit AF, Radford A, Ashraf J, Gopal M, Subramaniam R: Modified tubularized incised plate urethroplasty in distal hypospadias repair: Stepwise technique with validated functional and cosmetic outcome. J Pediatr Urol 13:86-87 (2017).

Springer A, Subramaniam R: Split dorsal dartos flap transposed ventrally as a bed for preputial skin graft in primary staged hypospadias repair. Urology 79:939-942 (2012).

Stanasel I, Le HK, Bilgutay A, Roth DR, Gonzales ET, Jr., Janzen N, Koh CJ, Gargollo P, Seth A: Complications following Staged Hypospadias Repair Using Transposed Preputial Skin Flaps. The Journal of urology 194:512-516 (2015).

Sueyoshi R, Seo S, Ochi T, Murakami H, Yazaki Y, Takeda M, Nakamura H, Lane GJ, Yamataka A: Reinforcing the ventral penile shaft with pedicled fat/connective tissues before urethroplasty lowers the risk for post-urethroplasty complications in hypospadias. J Pediatr Surg 51:2021-2024 (2016).

Sujijantararat P, Chaiyaprasithi B: Comparative outcome between transverse island flap onlay and tubularized incised plate for primary hypospadias repair. Asian J Surg 32:229-233 (2009).

Suoub M, Dave S, El-Hout Y, Braga LH, Farhat WA: Distal hypospadias repair with or without foreskin reconstruction: A single-surgeon experience. J Pediatr Urol 4:377-380 (2008).

Tam YH, Pang KK, Wong YS, Tsui SY, Wong HY, Mou JW, Chan KW, Lee KH: Improved outcomes after technical modifications in tubularized incised plate urethroplasty for mid-shaft and proximal hypospadias. Pediatr Surg Int 32:1087-1092 (2016).

Tan HL, Nah SA, Budianto II, Sehat S, Tamba R: The use of octyl cyanoacrylate (superglue) in hypospadias repair including its use as a fixator for urethral stents. J Pediatr Surg 47:2294-2297 (2012).

Tavakkoli Tabassi K, Mohammadi Rana T: Tubularized incised plate urethroplasty using buccal mucosa graft for repair of penile hypospadias. Urology journal 9:514-521 (2012).

Tavakkoli Tabassi K, Mohammadi S: Tunica vaginalis flap as a second layer for tubularized incised plate urethroplasty. Urology journal 7:254-257 (2010).

Thiry S, Gorduza D, Mouriquand P: Urethral advancement in hypospadias with a distal division of the corpus spongiosum: outcome in 158 cases. J Pediatr Urol 10:451-454 (2014).

Thiry S, Saussez T, Dormeus S, Tombal B, Wese FX, Feyaerts A: Long-Term Functional, Cosmetic and Sexual Outcomes of Hypospadias Correction Performed in Childhood. Urol Int 95:137-141 (2015).

Tijani KH, Idiodi-Thomas HO, Elebute OA, Alakaloko FM, Ojewola RW, Ademuyiwa AO: Two-stage flap repair of severe hypospadias: Usefulness of the tubularized incised plate urethroplasty. J Pediatr Urol 13:483.e481-483.e485 (2017).

Tiryaki S, lkbrova V, Dokumcu Z, Ergun R, Tekin A, Yagmur I, Ulman I, Avanoglu A: Unexpected outcome of a modification of Bracka repair for proximal hypospadias: High incidence of diverticula with flaps. J Pediatr Urol 12:395.e391-395.e396 (2016).

Tiryaki T: Combination of tubularized island flap and ventral skin flap techniques in single-stage correction of severe proximal hypospadias. Urol Int 84:269-274 (2010).

Turk E, Guven A, Karaca F, Edirne Y, Karaca I: Using the parents' video camera for the follow-up of children who have undergone hypospadias surgery decreases hospital anxiety of children. J Pediatr Surg 48:2332-2335 (2013).

Tuygun C, Bakirtas H, Gucuk A, Cakici H, Imamoglu A: Uroflow findings in older boys with tubularized incised-plate urethroplasty. Urol Int 82:71-76 (2009).

Vallasciani S, Berrettini A, Nanni L, Manzoni G, Marrocco G: Observational retrospective study on acquired megalourethra after primary proximal hypospadias repair and its recurrence after tapering. J Pediatr Urol 9:364-367 (2013).

van der Zwan YG, Callens N, van Kuppenveld J, Kwak K, Drop SL, Kortmann B, Dessens AB, Wolffenbuttel KP, Dutch Study Group on DSD: Long-term outcomes in males with disorders of sex development. The Journal of urology 190:1038-1042 (2013).

Vandendriessche S, Baeyens D, Van Hoecke E, Indekeu A, Hoebeke P: Body image and sexuality in adolescents after hypospadias surgery. J Pediatr Urol 6:54-59 (2010).

Vepakomma D, Alladi A, Ramareddy RS, Akhtar T: Modified koyanagi repair for severe hypospadias. J Indian Assoc Pediatr Surg 18:96-99 (2013).

Wang WW, Deng CH, Chen LW, Zhao LY, Mo JC, Tu XA: Psychosexual adjustment and age factors in 130 men undergone hypospadias surgery in a Chinese hospital. Andrologia 42:384-388 (2010).

Wang WW, Tu XA, Deng CH, Mo JC, Zhao L, Chen LW: Long-term sexual activity status and influencing factors in men after surgery for hypospadias. Asian Journal of Andrology 11:417-422 (2009).

Weber DM, Schonbucher VB, Gobet R, Gerber A, Landolt MA: Is there an ideal age for hypospadias repair? A pilot study. J Pediatr Urol 5:345-350 (2009).

Wehbi E, Patel P, Kanaroglou N, Tam S, Weber B, Lorenzo A, Pippi Salle JL, Bagli D, Koyle M, Farhat WA: Urinary tract abnormalities in boys with recurrent urinary tract infections after hypospadias repair. BJU Int 113:304-308 (2014).

Wilkinson DJ, Green PA, Beglinger S, Myers J, Hudson R, Edgar D, Kenny SE: Hypospadias surgery in England: Higher volume centres have lower complication rates. J Pediatr Urol 13:481.e481-481.e486 (2017).

Wishart ED, Metcalfe PD: A modification of the TIP procedure for distal hypospadias: The burrowing technique. Canadian Urological Association journal = Journal de l'Association des urologues du Canada 8:E425-428 (2014).

Xu N, Xue XY, Li XD, Wei Y, Zheng QS, Jiang T, Huang JB, Sun XL: Comparative outcomes of the tubularized incised plate and transverse island flap onlay techniques for the repair of proximal hypospadias. Int Urol Nephrol 46:487-491 (2014).

Xu N, Xue XY, Wei Y, Li XD, Zheng QS, Jiang T, Huang JB: Outcome analysis of tubularized incised plate repair in hypospadias: is a catheter necessary? Urol Int 90:354-357 (2013).

Yamataka A, Shimotakahara A, Miyano G, Hayashi Y, Takahashi T, Lane GJ, Kawashima K, Okawada M: Repair of hypospadias with severe chordee using a long, wide, U-shaped flap that preserves ventral penile tissues intact for second-stage urethroplasty. J Pediatr Surg 43:2260-2263 (2008).

Yang T, Zou Y, Zhang L, Su C, Li Z, Wen Y: Byars two-stage procedure for hypospadias after urethral plate transection. J Pediatr Urol 10:1133-1137 (2014).

Ye WJ, Ping P, Liu YD, Li Z, Huang YR: Single stage dorsal inlay buccal mucosal graft with tubularized incised urethral plate technique for hypospadias reoperations. Asian Journal of Andrology 10:682-686 (2008).

Yeap BH, Mohan N: Hypospadias from the perspective of a single-surgeon practice in Malaysia. The Medical journal of Malaysia 63:388-390 (2008).

Yigiter M, Yildiz A, Oral A, Salman AB: A comparative study to evaluate the effect of double dartos flaps in primary hypospadias repair: no fistula anymore. Int Urol Nephrol 42:985-990 (2010).

Yildiz A, Bakan V: Comparison of perimeatal-based flap and tubularized incised plate urethroplasty combined with single- or double-layer dartos flap in distal hypospadias. Urol Int 84:265-268 (2010).

Yildiz T, Tahtali IN, Ates DC, Keles I, Ilce Z: Age of patient is a risk factor for urethrocutaneous fistula in hypospadias surgery. J Pediatr Urol 9:900-903 (2013).

Zhao M, Li Y, Tang Y, Chen W, Yang Z, Li Q, Zhou C, Li F, Zhou Y: Two-stage repair with buccal mucosa for severe and complicated hypospadias in adults. International journal of urology : official journal of the Japanese Urological Association 18:155-161 (2011).

Zheng DC, Wang H, Lu MJ, Chen Q, Chen YB, Ren XM, Yao HJ, Xu MX, Zhang K, Cai ZK, Wang Z: A comparative study of the use of a transverse preputial island flap (the Duckett technique) to treat primary and secondary hypospadias in older Chinese patients with severe chordee. World J Urol 31:965-969 (2013).

Ziada A, Hamza A, Abdel-Rassoul M, Habib E, Mohamed A, Daw M: Outcomes of hypospadias repair in older children: a prospective study. The Journal of urology 185:2483-2485 (2011).

Zimmermann EF, Woodward MN: Isolated preputial reconstruction in distal hypospadias. J Pediatr Urol 10:399.e391-399.e392 (2014).
